# Supplementary material
Source: Springer Nature journal article supplement (https://www.springermedizin.de/resource/supplementary/12906_2010_374_MOESM7_ESM.pdf/9519634)

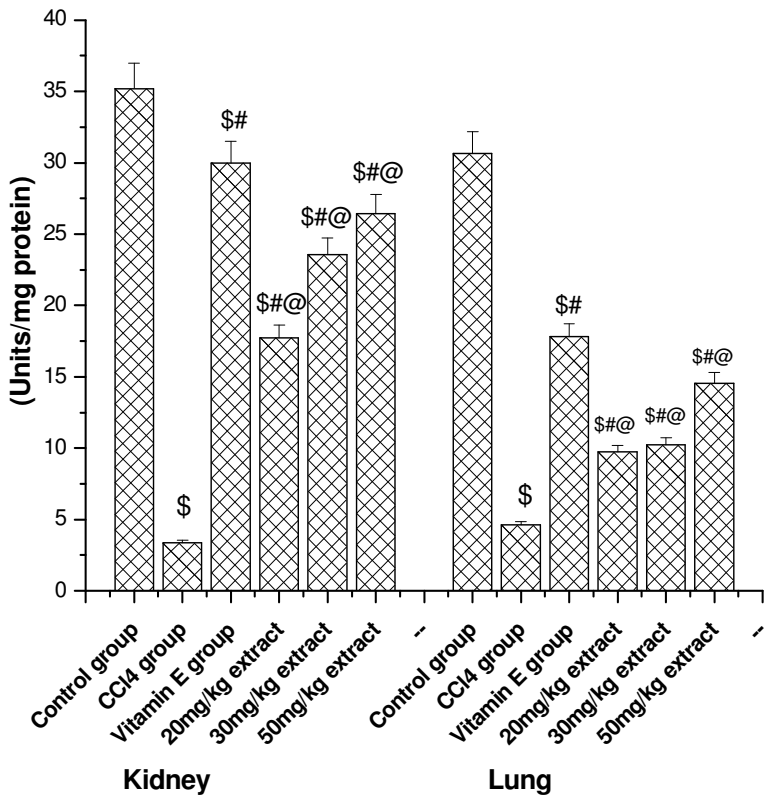

Supplement: MOESM7 [file 9519634]
